# Supplementary material
Source: publisher figshare collection journal article supplement (https://gsapubs.figshare.com/ndownloader/files/23305949)
Supplement: Supplementary file 1 [file 23305949]

# The seismic signature of lithospheric deformation beneath eastern North America due to Grenville and Appalachian orogenesis

**Maureen D. Long<sup>1\*</sup>, Heather A. Ford<sup>1,2</sup>, Lauren Abrahams<sup>1,3</sup>, and Erin A. Wirth<sup>4</sup>**

<sup>1</sup>Department of Geology and Geophysics, Yale University, PO Box 208109, New Haven, CT, 06520 USA

<sup>2</sup>Now at Department of Earth Sciences, University of California, Riverside, 900 University Ave., Riverside, CA, 92521 USA

<sup>3</sup>Also at Department of Geoscience, University of Wisconsin, Madison, 1215 West Dayton St., Madison, WI, 53706 USA

<sup>4</sup>Department of Earth and Space Sciences, University of Washington, 4000 15<sup>th</sup> Ave. NE, Seattle, WA, 98195 USA

\*Corresponding author. Email: maureen.long@yale.edu

## SUPPLEMENTARY FIGURE CAPTIONS

**Figure S1.** Backazimuthal RF gathers for station ACSO. Radial (left) and transverse (right) component receiver functions computed as described in the main text. RFs were computed from data that were lowpass filtered at 0.5 Hz and binned according to backazimuth (values shown on *y* axis) in 10° bins.

**Figure S2.** Epicentral distance RF gathers for station ACSO. Radial (left) and transverse (right) component receiver functions computed as described in the main text. RFs were computed from data that were lowpass filtered at 0.5 Hz and binned according to epicentral distance (values shown on *y* axis) in 5° bins.

**Figure S3.** Same as Figure S1, for station BINY.

**Figure S4.** Same as Figure S2, for station BINY.

**Figure S5.** Same as Figure S1, for station ERPA.

**Figure S6.** Same as Figure S2, for station ERPA.

**Figure S7.** Same as Figure S1, for station MCWV.

**Figure S8.** Same as Figure S2, for station MCWV.

**Figure S9.** Same as Figure S1, for station SSPA.

**Figure S10.** Same as Figure S2, for station SSPA.

**Figure S11.** Same as Figure S1, for station TZTN.

**Figure S12.** Same as Figure S2, for station TZTN.

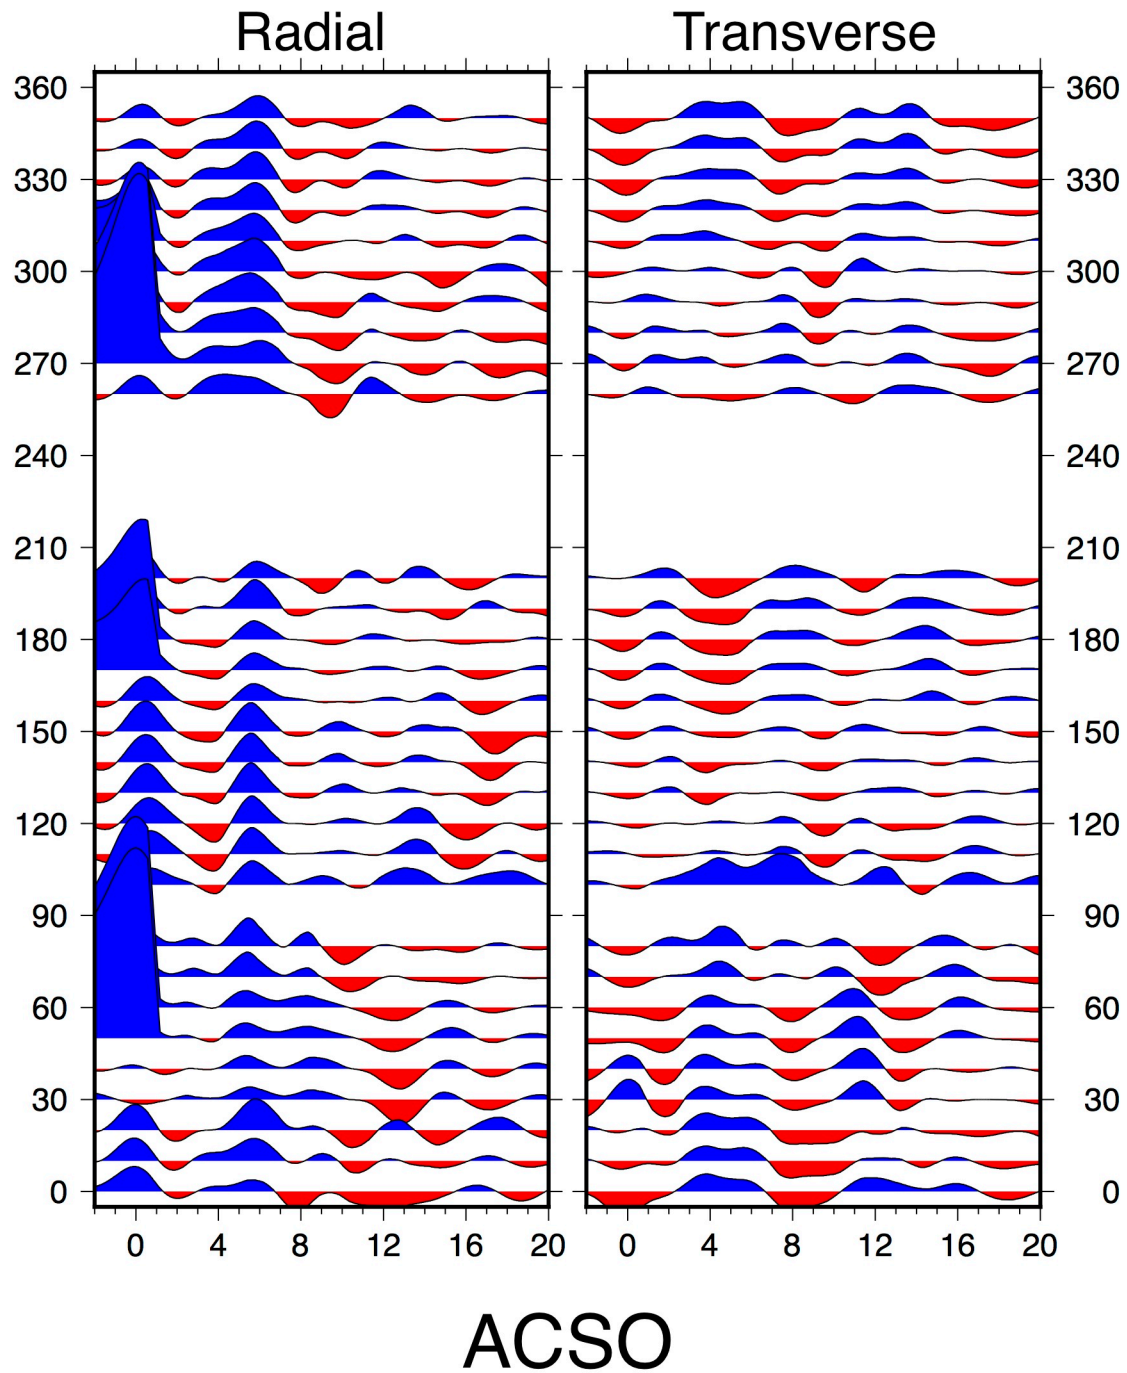

**Figure S1**

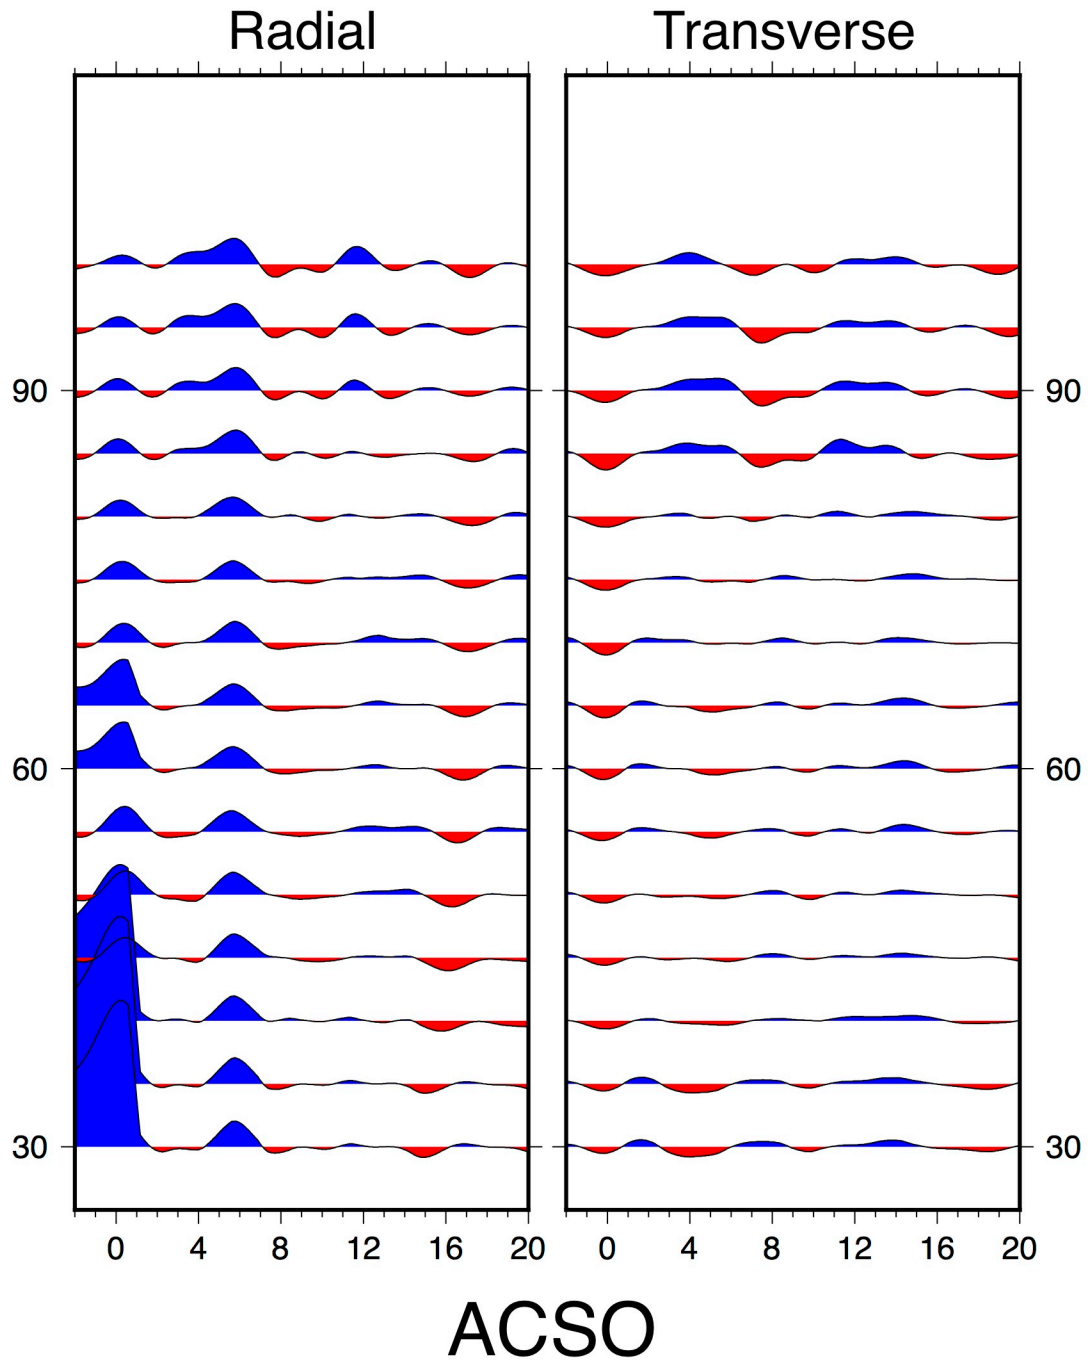

**Figure S2**

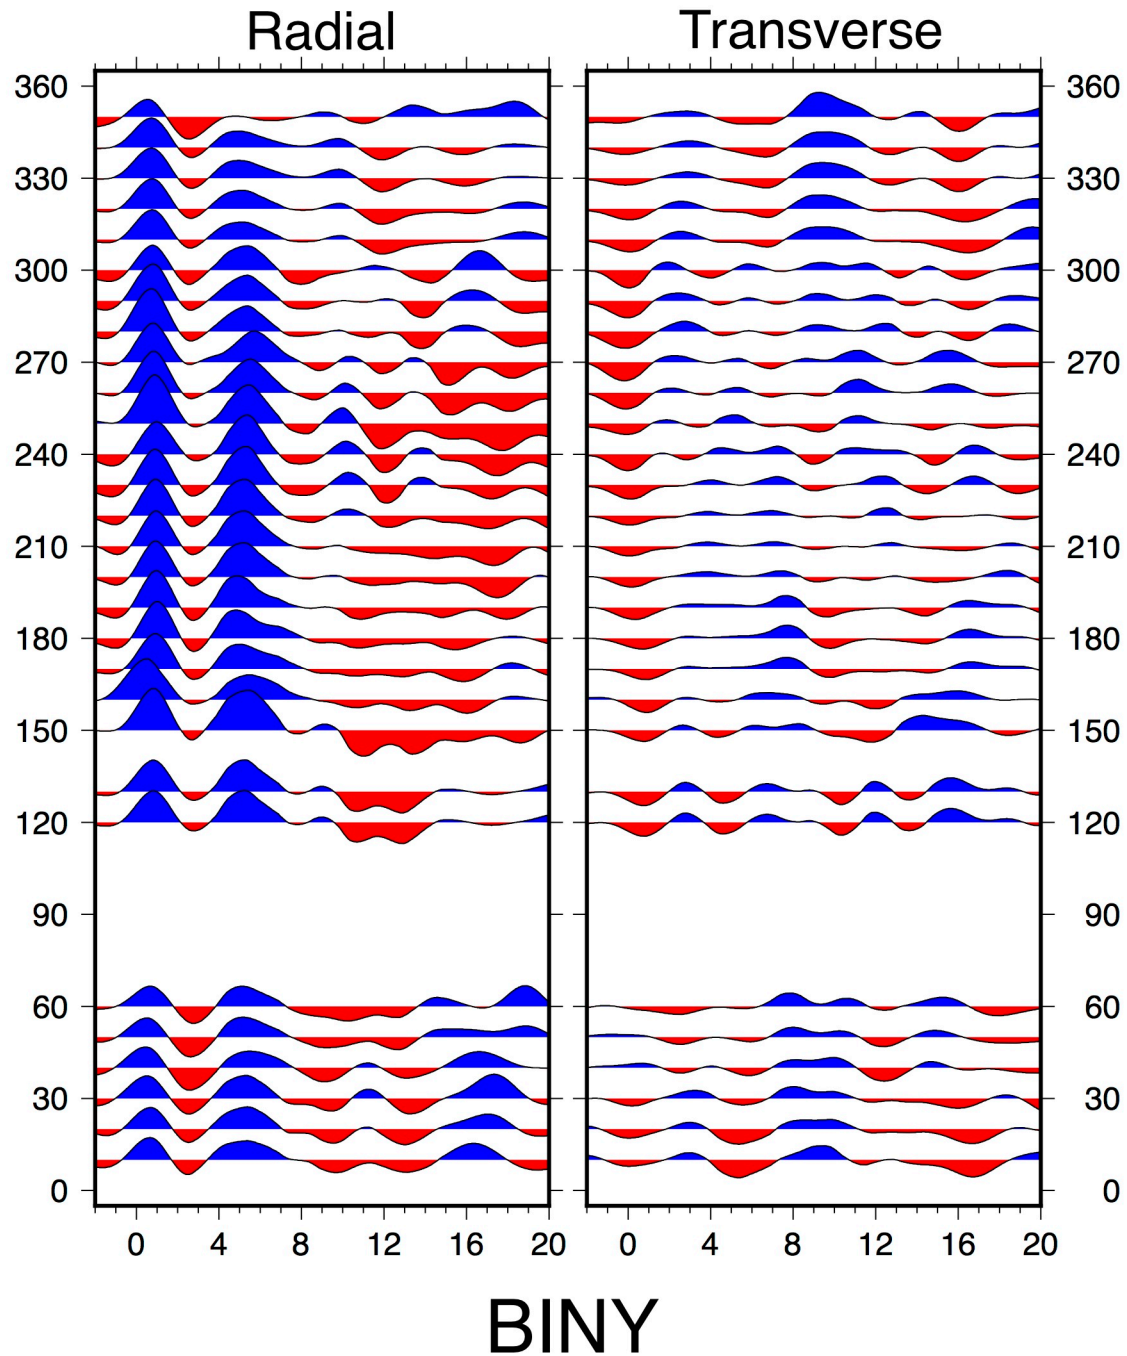

**Figure S3**

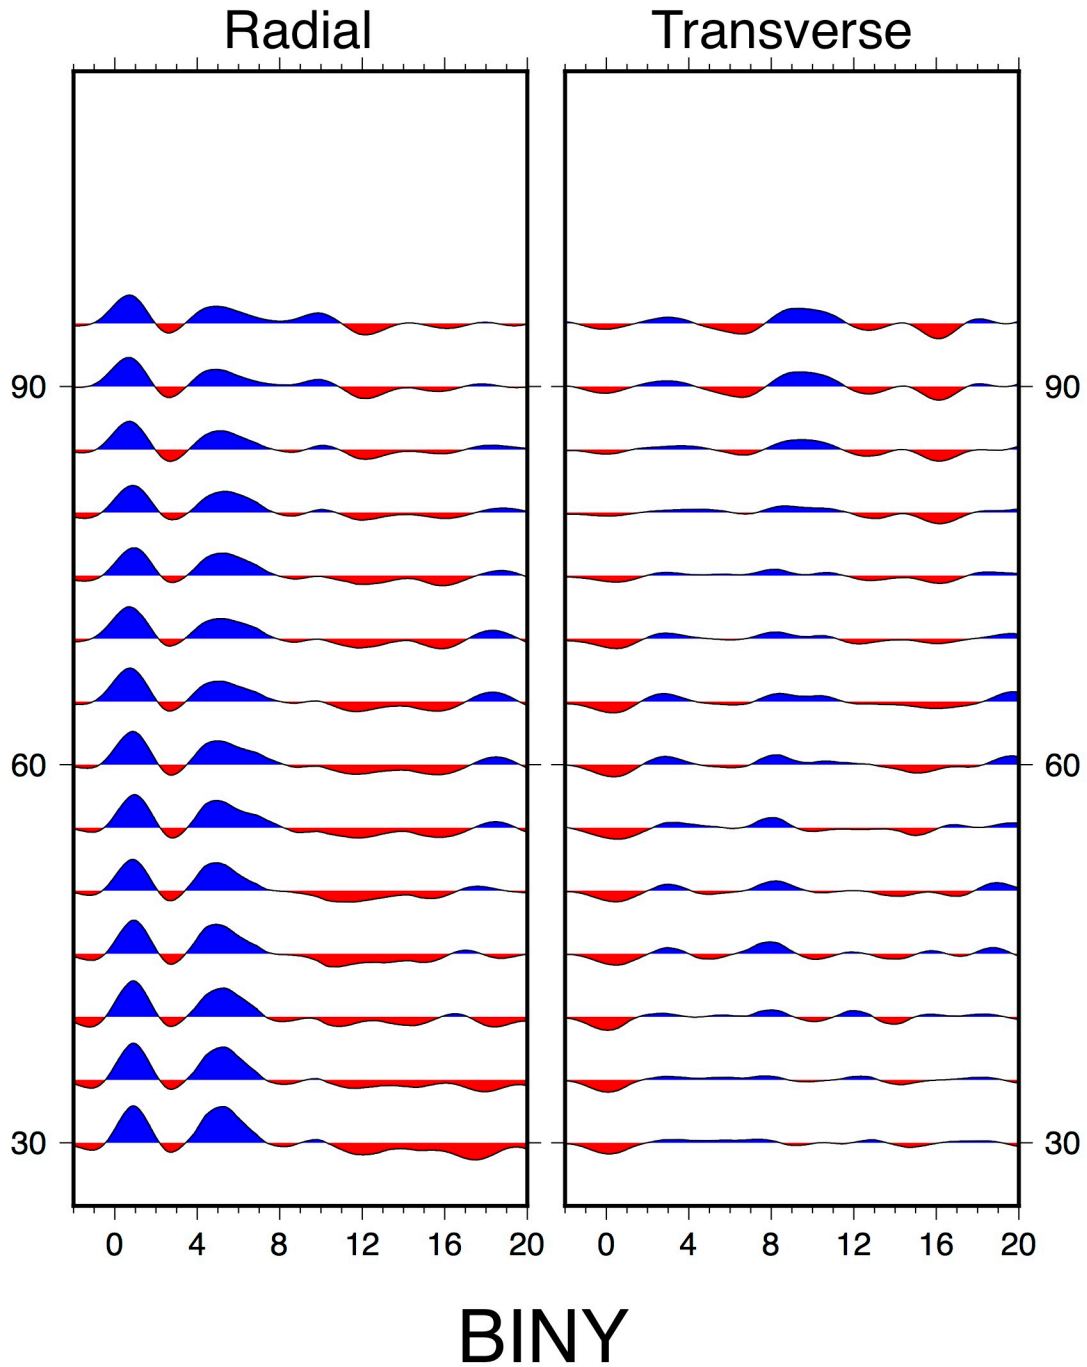

**Figure S4**

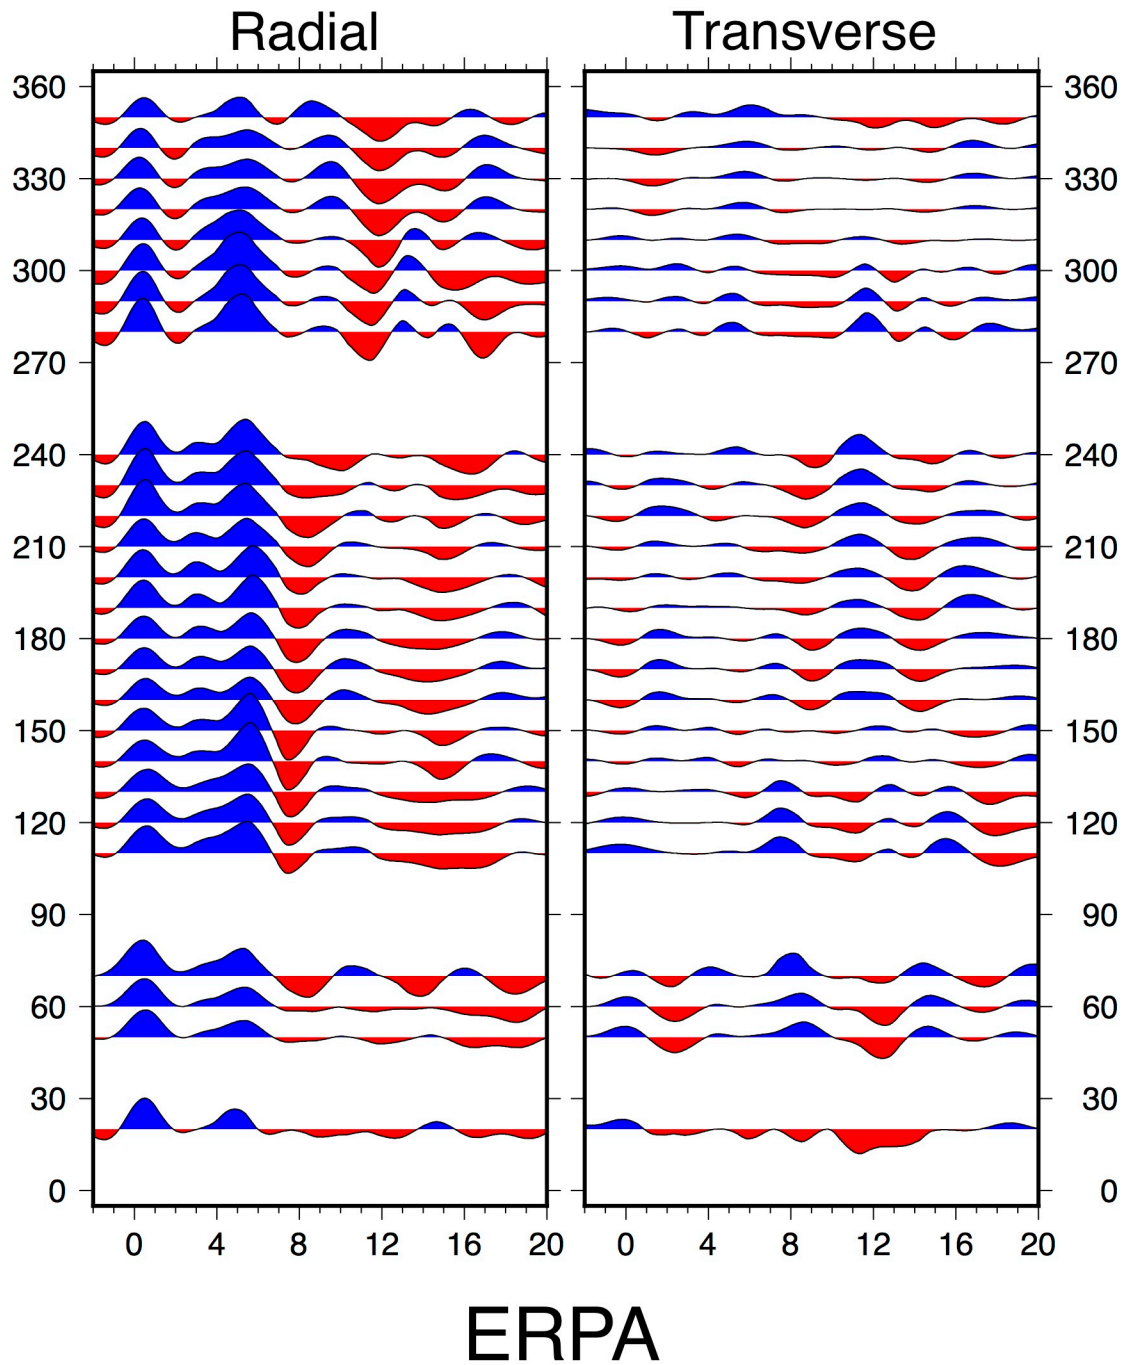

**Figure S5**



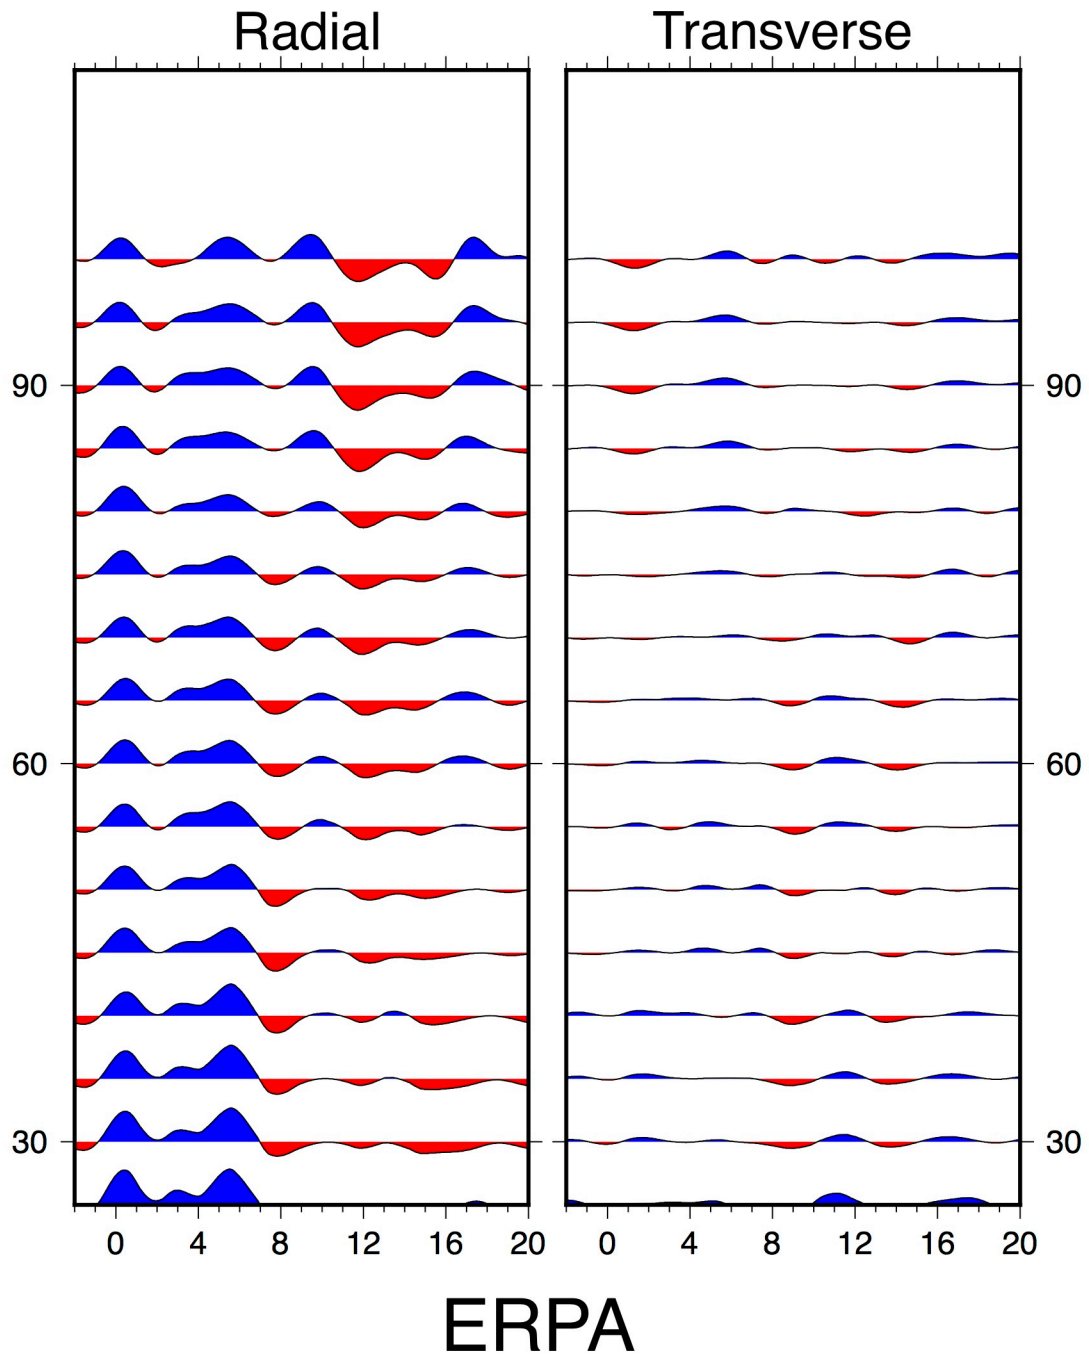

**Figure S6**



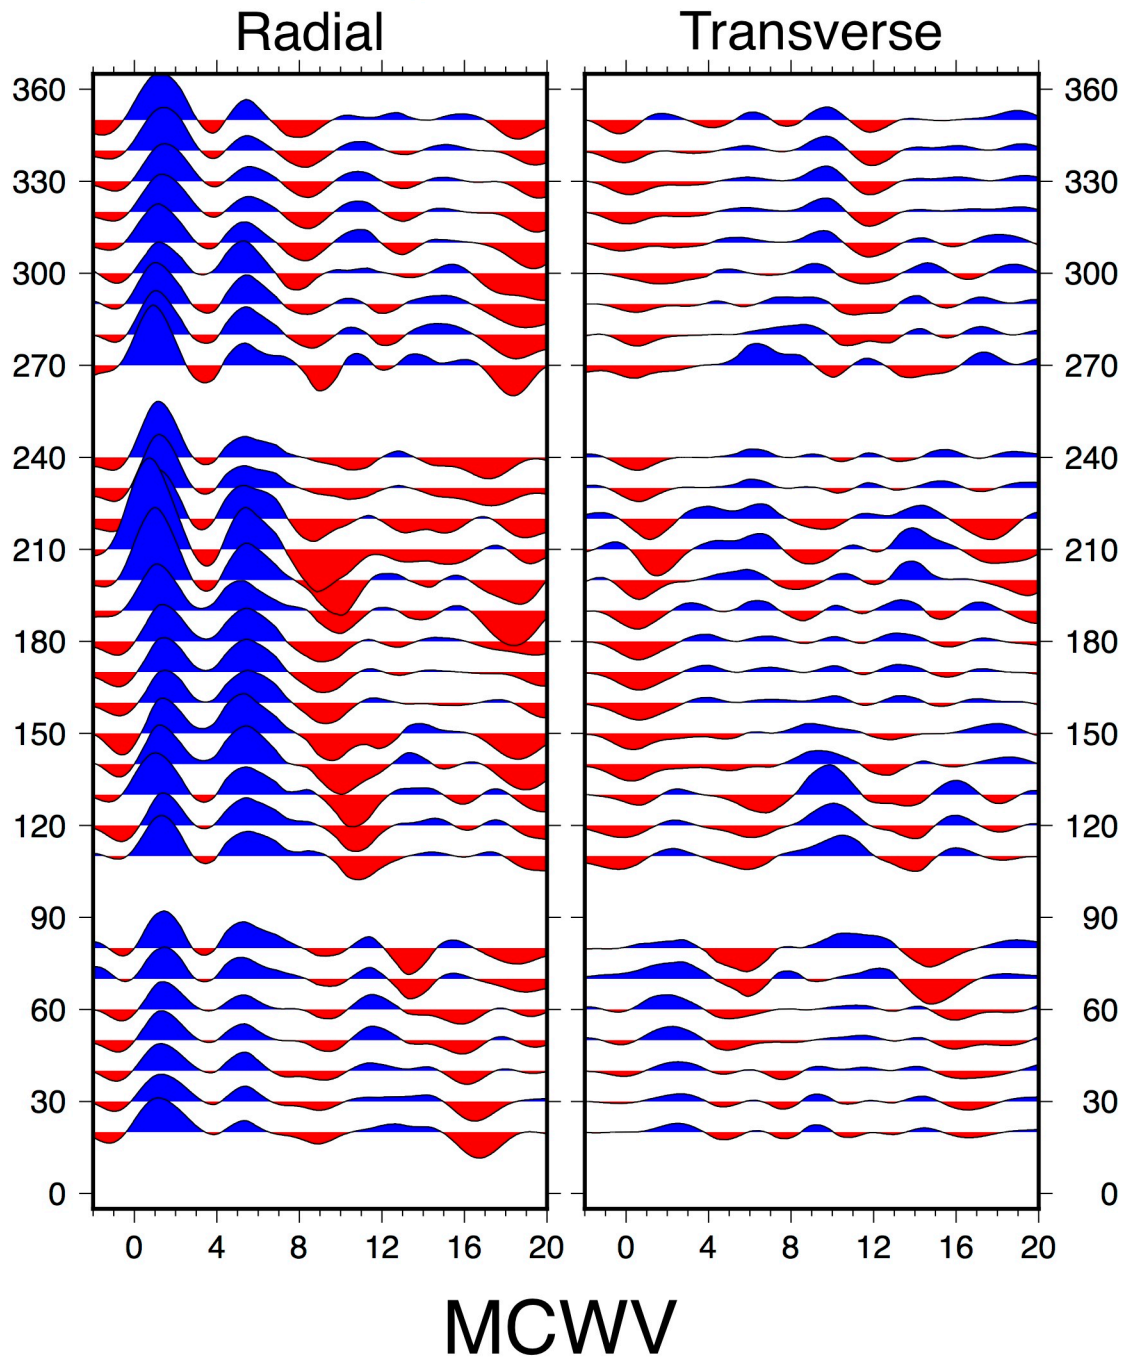

**Figure S7**

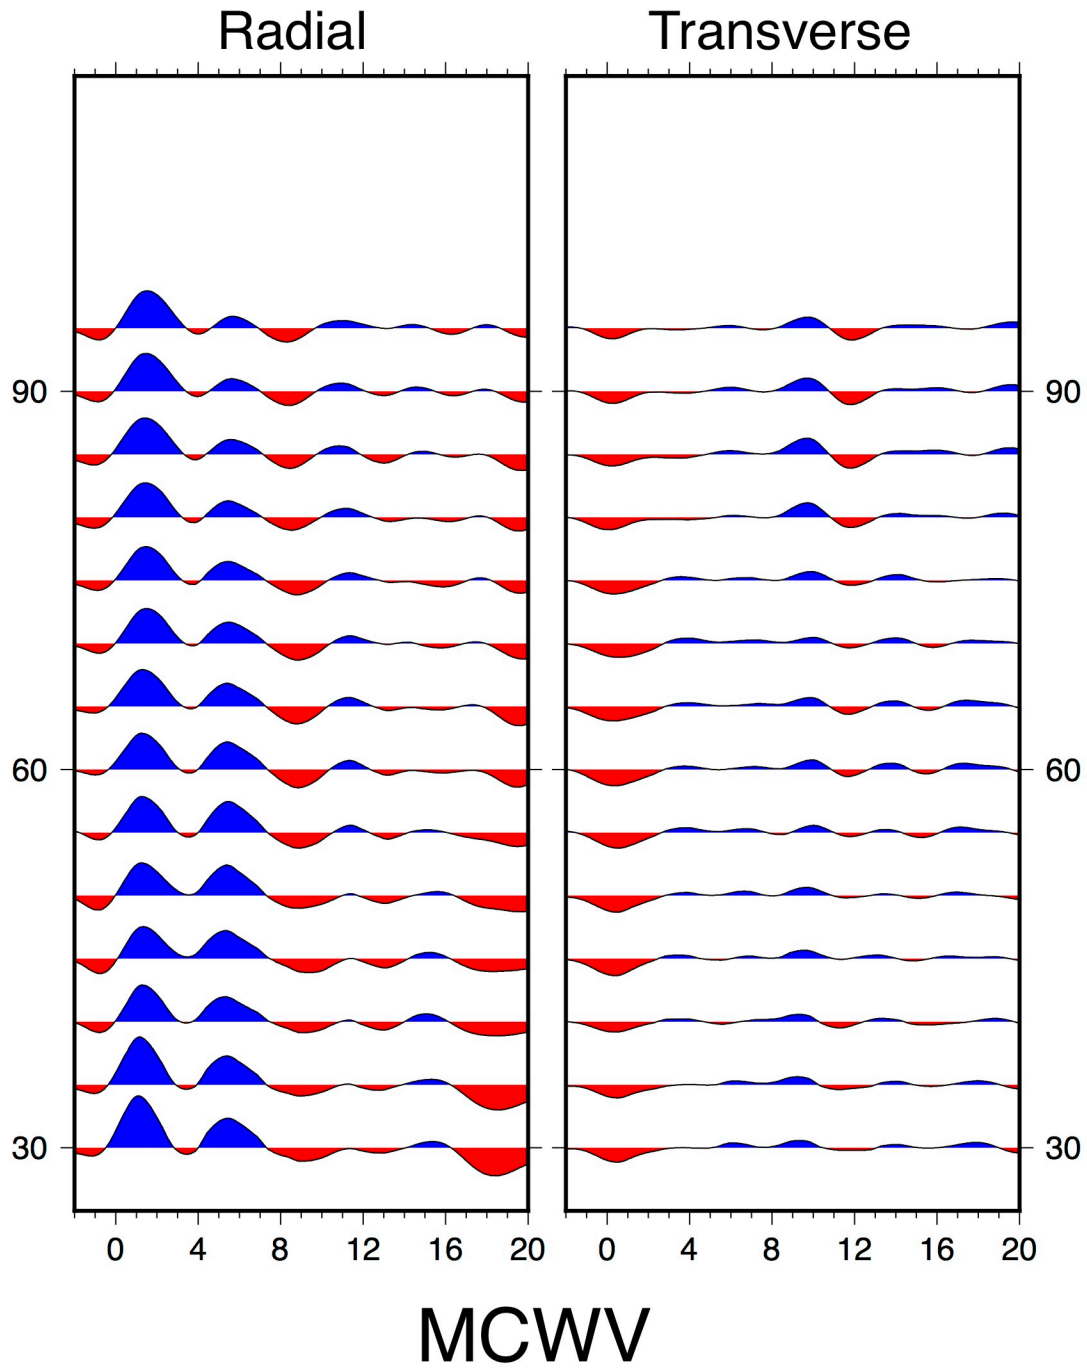

**Figure S8**

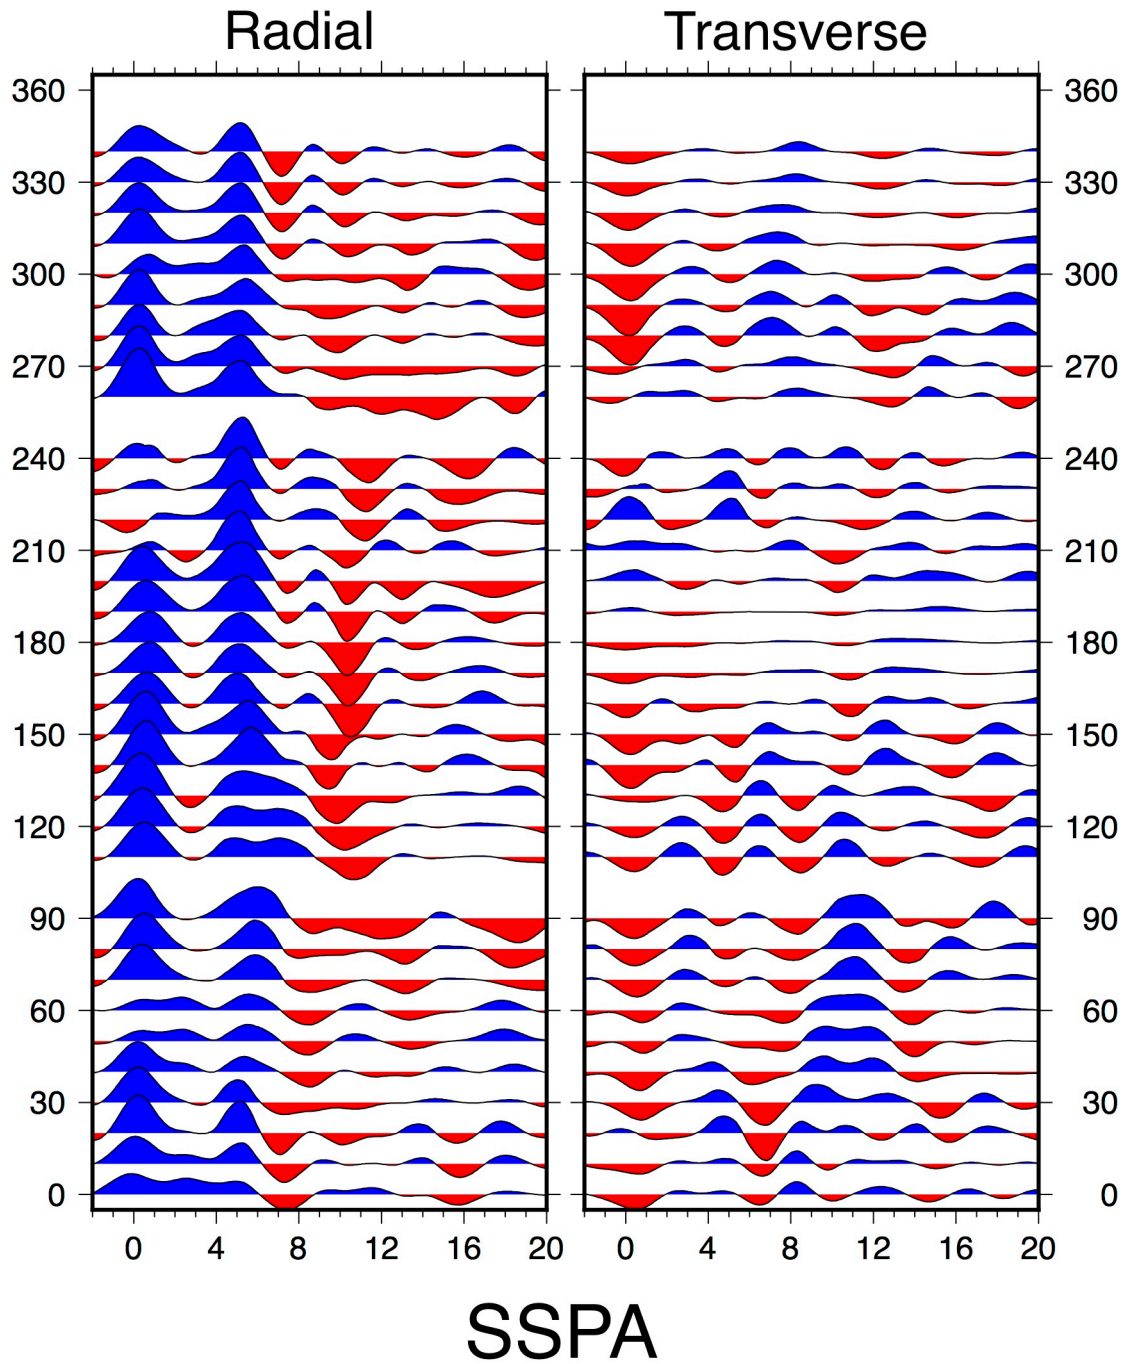

**Figure S9**

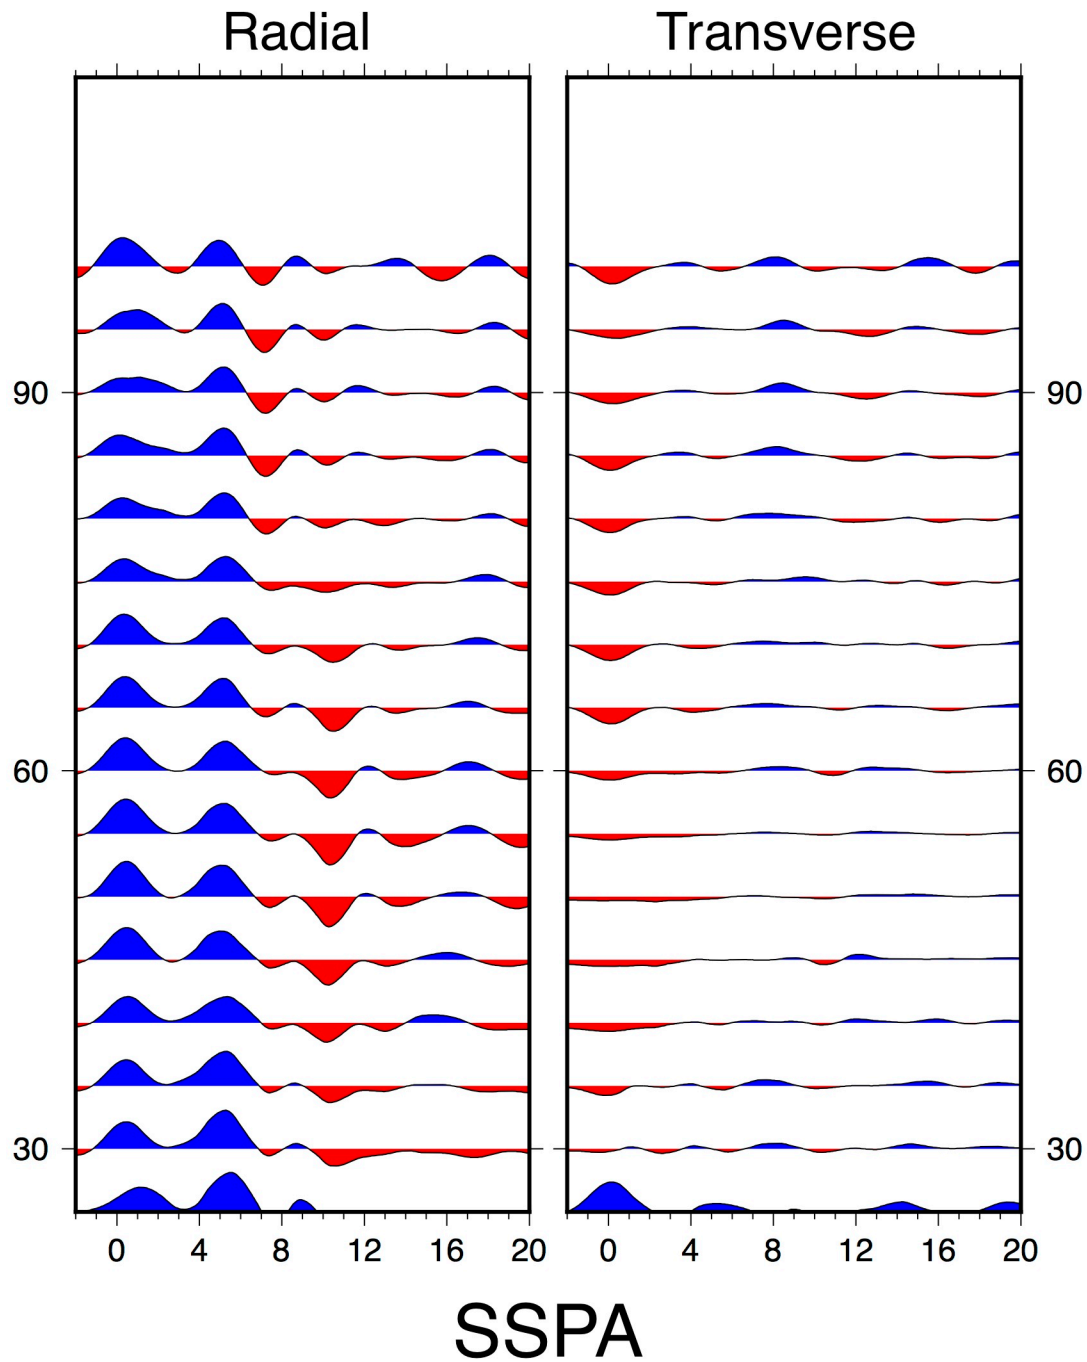

**Figure S10**

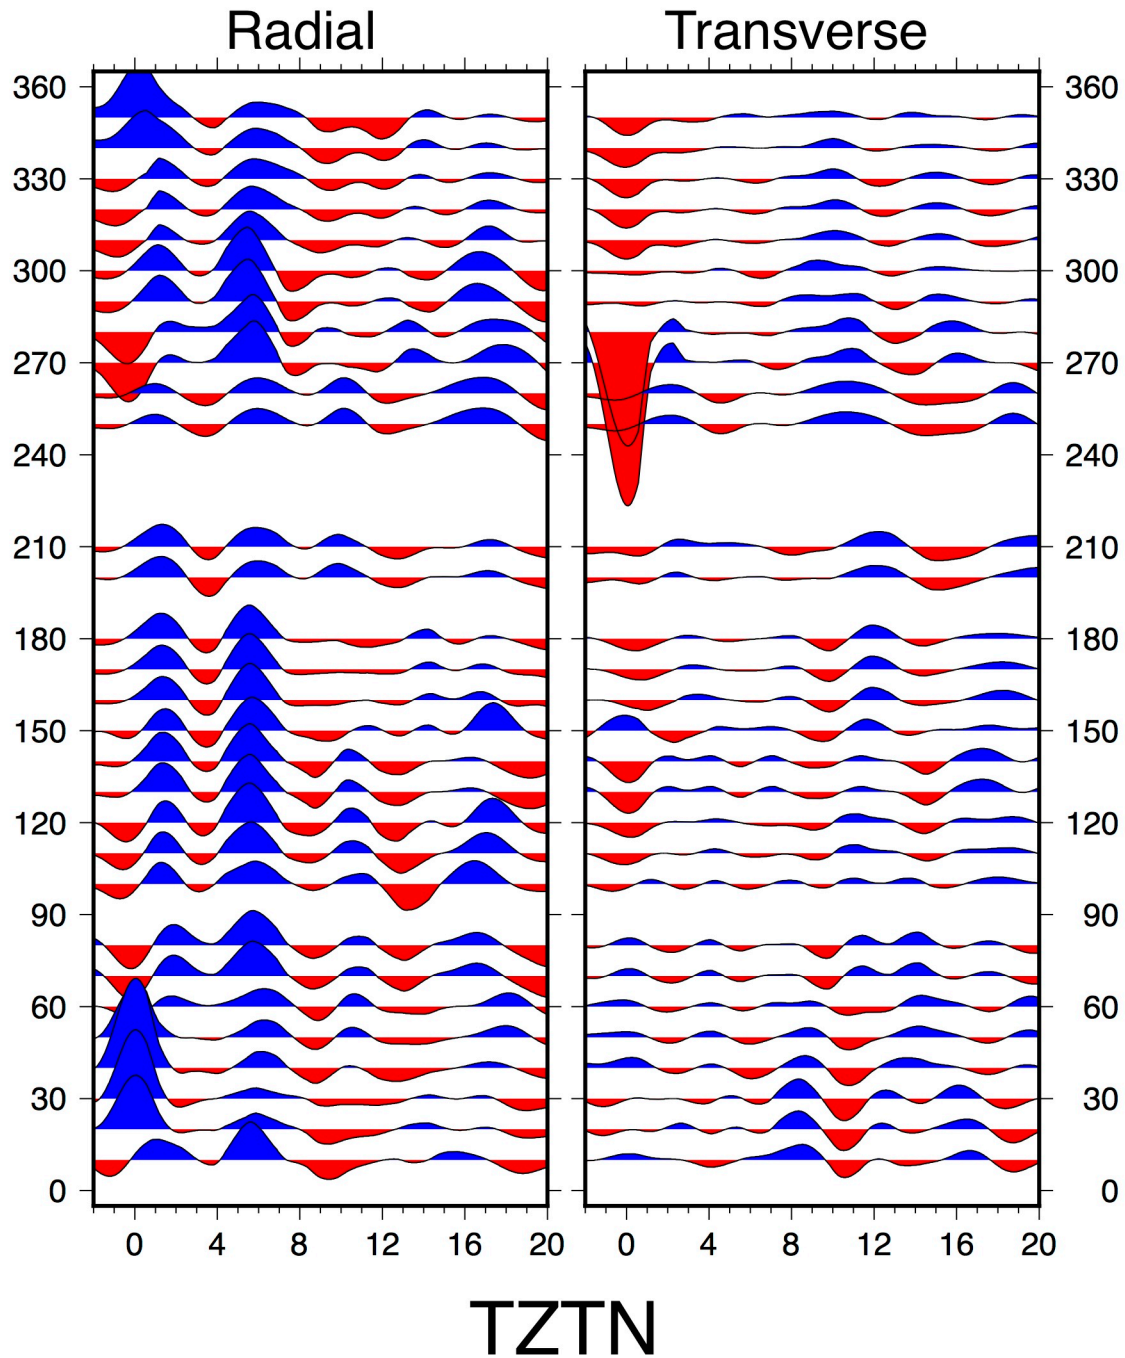

**Figure S11**



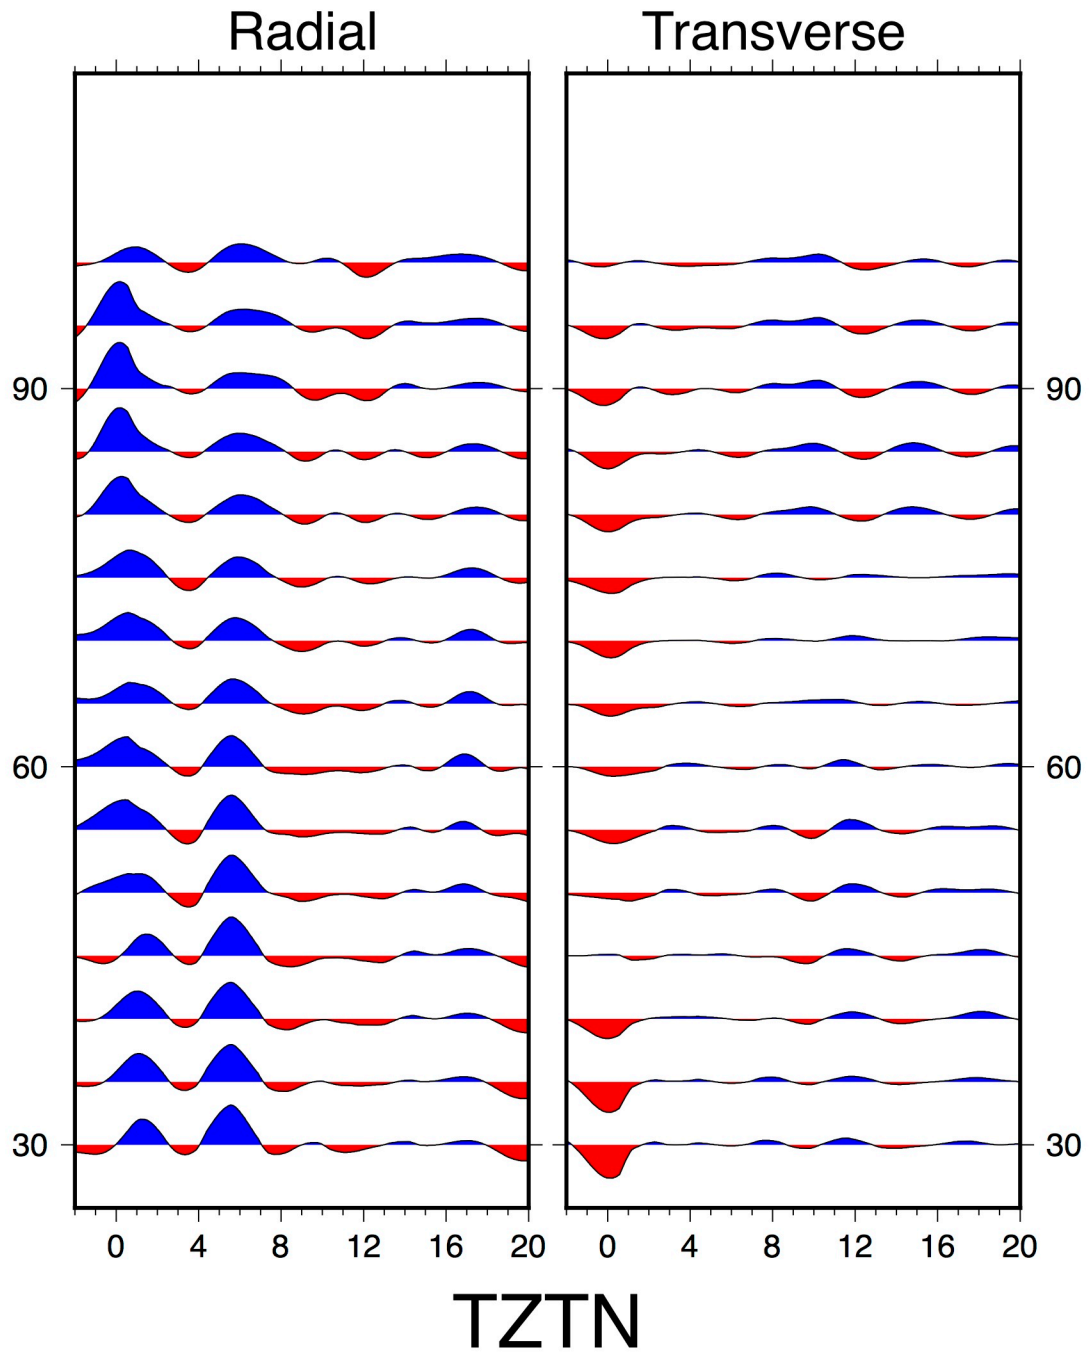

**Figure S12**
